# Supplementary material for: The lead and cadmium content in rice and risk to human health in China: A systematic review and meta-analysis
Source: PubMed Central journal article supplement (PMC9754602; doi:10.1371/journal.pone.0278686), 2022-12-15

# PLOS ONE

## Heavy metals in rice and risk to human health in China: a systematic review and meta-analysis --Manuscript Draft--

|                                                                                                                                                                                                                                                                                                                                                                                                                                                                         |                                                                                                                                                                                                                                                                                                                                                                                                                                                                                                                                                                                                                                                                                                                                                                                                                                                                     |
|-------------------------------------------------------------------------------------------------------------------------------------------------------------------------------------------------------------------------------------------------------------------------------------------------------------------------------------------------------------------------------------------------------------------------------------------------------------------------|---------------------------------------------------------------------------------------------------------------------------------------------------------------------------------------------------------------------------------------------------------------------------------------------------------------------------------------------------------------------------------------------------------------------------------------------------------------------------------------------------------------------------------------------------------------------------------------------------------------------------------------------------------------------------------------------------------------------------------------------------------------------------------------------------------------------------------------------------------------------|
| <b>Manuscript Number:</b>                                                                                                                                                                                                                                                                                                                                                                                                                                               | PONE-D-22-16207                                                                                                                                                                                                                                                                                                                                                                                                                                                                                                                                                                                                                                                                                                                                                                                                                                                     |
| <b>Article Type:</b>                                                                                                                                                                                                                                                                                                                                                                                                                                                    | Research Article                                                                                                                                                                                                                                                                                                                                                                                                                                                                                                                                                                                                                                                                                                                                                                                                                                                    |
| <b>Full Title:</b>                                                                                                                                                                                                                                                                                                                                                                                                                                                      | Heavy metals in rice and risk to human health in China: a systematic review and meta-analysis                                                                                                                                                                                                                                                                                                                                                                                                                                                                                                                                                                                                                                                                                                                                                                       |
| <b>Short Title:</b>                                                                                                                                                                                                                                                                                                                                                                                                                                                     | Heavy metals in rice and risk to human health in China                                                                                                                                                                                                                                                                                                                                                                                                                                                                                                                                                                                                                                                                                                                                                                                                              |
| <b>Corresponding Author:</b>                                                                                                                                                                                                                                                                                                                                                                                                                                            | HONGYU ZHOU<br>Chongqing Medical University<br>Chongqing, CHINA                                                                                                                                                                                                                                                                                                                                                                                                                                                                                                                                                                                                                                                                                                                                                                                                     |
| <b>Keywords:</b>                                                                                                                                                                                                                                                                                                                                                                                                                                                        | rice; Heavy Metals; lead; cadmium; health risk; China; meta-analysis                                                                                                                                                                                                                                                                                                                                                                                                                                                                                                                                                                                                                                                                                                                                                                                                |
| <b>Abstract:</b>                                                                                                                                                                                                                                                                                                                                                                                                                                                        | Numerous studies have investigated concentrations of lead (Pb) and cadmium (Cd) in rice in China, but have come to divergent conclusions. Therefore we systematically reviewed and meta-analyzed the available evidence on levels of Pb and Cd in rice in different regions of China in order to assess the potential risk to human health. The meta-analysis included 24 studies of Pb levels and 29 studies of Cd levels, published in 2011-2021. The pooled Pb concentration in rice was 0.10 mg per kg dry weight (95% CI 0.08–0.11), while the pooled Cd concentration was 0.16 mg per kg dry weight (95% CI 0.14–0.18). These levels are within the limits specified by national food safety standards. However, the total target hazard quotient for both metals exceeded 1.0 for adults and children, suggesting that rice consumption poses a health risk. |
| <b>Order of Authors:</b>                                                                                                                                                                                                                                                                                                                                                                                                                                                | XIANLIANG HUANG, Postgraduate<br>BO ZHAO, Postgraduate<br>YANLEI WU, Postgraduate<br>MINGTIAN TAN, Postgraduate<br>LISHA SHEN, Undergraduate<br>GUIRONG FENG, Postgraduate<br>XIAOSHAN YANG, Doctor<br>SHIQI CHEN, Undergraduate<br>HONGYU ZHOU, Doctor                                                                                                                                                                                                                                                                                                                                                                                                                                                                                                                                                                                                             |
| <b>Additional Information:</b>                                                                                                                                                                                                                                                                                                                                                                                                                                          |                                                                                                                                                                                                                                                                                                                                                                                                                                                                                                                                                                                                                                                                                                                                                                                                                                                                     |
| <b>Question</b>                                                                                                                                                                                                                                                                                                                                                                                                                                                         | <b>Response</b>                                                                                                                                                                                                                                                                                                                                                                                                                                                                                                                                                                                                                                                                                                                                                                                                                                                     |
| <b>Financial Disclosure</b><br><br>Enter a financial disclosure statement that describes the sources of funding for the work included in this submission. Review the <a href="#">submission guidelines</a> for detailed requirements. View published research articles from <a href="#">PLOS ONE</a> for specific examples.<br><br>This statement is required for submission and <b>will appear in the published article</b> if the submission is accepted. Please make | This work was supported by the National Key R&D Program of China and Chongqing Science and Technology Bureau.                                                                                                                                                                                                                                                                                                                                                                                                                                                                                                                                                                                                                                                                                                                                                       |

sure it is accurate.

#### Unfunded studies

Enter: *The author(s) received no specific funding for this work.*

#### Funded studies

Enter a statement with the following details:

- Initials of the authors who received each award
- Grant numbers awarded to each author
- The full name of each funder
- URL of each funder website
- Did the sponsors or funders play any role in the study design, data collection and analysis, decision to publish, or preparation of the manuscript?
- **NO** - Include this sentence at the end of your statement: *The funders had no role in study design, data collection and analysis, decision to publish, or preparation of the manuscript.*
- **YES** - Specify the role(s) played.

\* typeset

#### Competing Interests

Use the instructions below to enter a competing interest statement for this submission. On behalf of all authors, disclose any [competing interests](#) that could be perceived to bias this work—acknowledging all financial support and any other relevant financial or non-financial competing interests.

This statement is **required** for submission and **will appear in the published article** if the submission is accepted. Please make sure it is accurate and that any funding sources listed in your Funding Information later in the submission form are also declared in your Financial Disclosure statement.

View published research articles from [PLOS ONE](#) for specific examples.

The authors have declared that no competing interests exist.

**NO authors have competing interests**

Enter: *The authors have declared that no competing interests exist.*

**Authors with competing interests**

Enter competing interest details beginning with this statement:

*I have read the journal's policy and the authors of this manuscript have the following competing interests: [insert competing interests here]*

\* typeset

**Ethics Statement**

N/A

Enter an ethics statement for this submission. This statement is required if the study involved:

- Human participants
- Human specimens or tissue
- Vertebrate animals or cephalopods
- Vertebrate embryos or tissues
- Field research

Write "N/A" if the submission does not require an ethics statement.

General guidance is provided below. Consult the [submission guidelines](#) for detailed instructions. **Make sure that all information entered here is included in the Methods section of the manuscript.**

**Format for specific study types**

**Human Subject Research (involving human participants and/or tissue)**

- Give the name of the institutional review board or ethics committee that approved the study
- Include the approval number and/or a statement indicating approval of this research
- Indicate the form of consent obtained (written/oral) or the reason that consent was not obtained (e.g. the data were analyzed anonymously)

**Animal Research (involving vertebrate animals, embryos or tissues)**

- Provide the name of the Institutional Animal Care and Use Committee (IACUC) or other relevant ethics board that reviewed the study protocol, and indicate whether they approved this research or granted a formal waiver of ethical approval
- Include an approval number if one was obtained
- If the study involved *non-human primates*, add *additional details* about animal welfare and steps taken to ameliorate suffering
- If anesthesia, euthanasia, or any kind of animal sacrifice is part of the study, include briefly which substances and/or methods were applied

**Field Research**

Include the following details if this study involves the collection of plant, animal, or other materials from a natural setting:

- Field permit number
- Name of the institution or relevant body that granted permission

**Data Availability**

Authors are required to make all data underlying the findings described fully available, without restriction, and from the time of publication. PLOS allows rare exceptions to address legal and ethical concerns. See the [PLOS Data Policy](#) and [FAQ](#) for detailed information.

Yes - all data are fully available without restriction

A Data Availability Statement describing where the data can be found is required at submission. Your answers to this question constitute the Data Availability Statement and **will be published in the article**, if accepted.

**Important:** Stating 'data available on request from the author' is not sufficient. If your data are only available upon request, select 'No' for the first question and explain your exceptional situation in the text box.

Do the authors confirm that all data underlying the findings described in their manuscript are fully available without restriction?

**Describe where the data may be found in full sentences. If you are copying our sample text, replace any instances of XXX with the appropriate details.**

- If the data are **held or will be held in a public repository**, include URLs, accession numbers or DOIs. If this information will only be available after acceptance, indicate this by ticking the box below. For example: *All XXX files are available from the XXX database (accession number(s) XXX, XXX).*
- If the data are all contained **within the manuscript and/or Supporting Information files**, enter the following: *All relevant data are within the manuscript and its Supporting Information files.*
- If neither of these applies but you are able to provide **details of access elsewhere**, with or without limitations, please do so. For example:

*Data cannot be shared publicly because of [XXX]. Data are available from the XXX Institutional Data Access / Ethics Committee (contact via XXX) for researchers who meet the criteria for access to confidential data.*

*The data underlying the results presented in the study are available from (include the name of the third party*

All relevant data are within the manuscript and its Supporting Information files.

|                                                                                                                                                                                                                                         |                                                                                                                                                                                  |
|-----------------------------------------------------------------------------------------------------------------------------------------------------------------------------------------------------------------------------------------|----------------------------------------------------------------------------------------------------------------------------------------------------------------------------------|
| <p><i>and contact information or URL).</i></p> <ul style="list-style-type: none"><li>• This text is appropriate if the data are owned by a third party and authors do not have permission to share the data.</li></ul> <p>* typeset</p> |                                                                                                                                                                                  |
| Additional data availability information:                                                                                                                                                                                               | Tick here if the URLs/accession numbers/DOIs will be available only after acceptance of the manuscript for publication so that we can ensure their inclusion before publication. |

1 **Heavy metals in rice and risk to human health in China: a systematic review and**  
2 **meta-analysis**

3 **Xianliang Huang<sup>a,b</sup>, Bo Zhao<sup>a,b</sup>, Yanlei Wu<sup>a,b</sup>, Mingtian Tan<sup>a,b</sup>, Lisha Shen<sup>c</sup>,**  
4 **Guirong Feng<sup>a,b</sup>, Xiaoshan Yang<sup>a</sup>, Shiqi Chen<sup>a,b</sup>, Hongyu Zhou<sup>d,e\*</sup>**

5

6 <sup>a</sup> Food Laboratory, Chongqing Institute for Food and Drug Control, Chongqing 401121,  
7 China

8 <sup>b</sup> Key Laboratory of Condiment Supervision Technology for State Market Regulation,  
9 Chongqing 401121, China

10 <sup>c</sup> Chongqing Academy of Chinese Materia Medica, Chongqing 400065, China

11 <sup>d</sup> College of Public Health and Management, Chongqing Medical University,  
12 Chongqing 400016, China

13 <sup>e</sup> The First Affiliated Hospital of Chongqing Medical University, Chongqing 400016,  
14 China

15

16 \* Corresponding author

17 Address: No.1 Yixueyuan Road, Yuzhong District, Chongqing 400016, China

18 Tel.: +86 23 8901 2364

19 Fax: +86 23 8901 2364

20 E-mail address: [hyzhou@cqmu.edu.cn](mailto:hyzhou@cqmu.edu.cn)

21

22

23 **Abstract**

24 Numerous studies have investigated concentrations of lead (Pb) and cadmium (Cd) in  
25 rice in China, but have come to divergent conclusions. Therefore we systematically  
26 reviewed and meta-analyzed the available evidence on levels of Pb and Cd in rice in  
27 different regions of China in order to assess the potential risk to human health. The  
28 meta-analysis included 24 studies of Pb levels and 29 studies of Cd levels, published in  
29 2011-2021. The pooled Pb concentration in rice was 0.10 mg per kg dry weight (95%  
30 CI 0.08–0.11), while the pooled Cd concentration was 0.16 mg per kg dry weight (95%  
31 CI 0.14–0.18). These levels are within the limits specified by national food safety  
32 standards. However, the total target hazard quotient for both metals exceeded 1.0 for  
33 adults and children, suggesting that rice consumption poses a health risk.

34

35 **Keywords**

36 rice; heavy metals; lead; cadmium; health risk; China; meta-analysis



37 **Introduction**

38 Rice is a well-known staple food, consumed by about 50% of the population in more  
39 than 100 countries around the world. As the most populous country in the world, China  
40 is the largest producer and consumer of rice in the world. China's annual rice production  
41 totals approximately  $2.07 \times 10^{11}$  kg and accounts for nearly 34% of total global output  
42 (1-3). Growing industrialization and use of fertilizer have led to the continuing  
43 accumulation of toxic heavy metals in the soil of rice paddies, from which the metals  
44 can enter rice (4, 5). This accumulation is especially high in southern China, which has  
45 rapidly industrialized (6).

46  
47 Many studies have shown that the heavy metal content in rice exceeds food safety  
48 standards in China (7), especially levels of cadmium (Cd) and lead (Pb) (8-10). The  
49 legal limit for both metals in rice is 0.2 mg/kg. The mean Cd levels in rice grain have  
50 been reported to be 0.69 mg/kg in Xiangtan County of Hunan Province (11), 0.62 mg/kg  
51 in Shaoguan City of Guangdong Province (12), and 0.29 mg/kg along the Yangtze River  
52 in Hubei, Hunan, and Jiangxi Provinces (13). The study in the Yangtze River area has  
53 also reported a mean Pb level of 0.25 mg/kg in rice grain (13).

54  
55 Elevated dietary consumption of Pb and Cd from rice may harm human health (14, 15).  
56 Cd can damage kidneys as well as the pulmonary, cardiovascular, and musculoskeletal  
57 systems. Elevated Cd consumption has also been linked to Itai-Itai symptom (16-19).

58 Pb, for its part, can damage the immune, digestive, and nervous systems, as well as  
59 compromise cognitive development (20-22). Several studies in different regions of  
60 China have assessed whether levels of Pb and Cd in rice pose a health risk (23-25), but  
61 they have come to divergent conclusions. For example, a study in Guizhou Province  
62 concluded that levels of Cd and Pb in rice were too low to pose a health risk (26), while  
63 a study in the Pearl River Delta concluded the opposite (27). The relatively small  
64 samples in individual studies has prevented a coherent, overall evaluation of risk.

65

66 Therefore we systematically reviewed and meta-analyzed the available evidence on

67 levels of Pb and Cd in rice in different regions of China and assessed the risk to human

68 health.

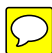

69

## 70 **Materials and methods**

### 71 **Search strategy**

72 Two authors (B.Z. and G.R.F.) searched for relevant studies in PubMed, Web of Science  
73 and ScienceDirect databases that were published from January 2011 through October  
74 2021. The search string was “rice” AND (“heavy metal” OR “lead” OR “cadmium”)  
75 AND “China”. Only studies published in English were considered. Reference lists in  
76 selected articles and relevant review articles were manually searched to identify  
77 additional studies.

78

79 **Inclusion and exclusion criteria**

80 After the initial screening, the full text of potentially eligible articles were downloaded  
81 and evaluated carefully according to the inclusion and exclusion criteria. The studies  
82 were included if they measured levels of Pb and Cd in rice in China, were published in  
83 English, and were available as full text. Studies were excluded if they measured metal  
84 levels in cooked rice, rice planted on an experimental farm, rice paddies located near  
85 mining and smelting areas, or rice samples collected from markets.

86

87 **Definitions and data extraction**

88 Two authors (M.T.T. and L.S.S.) independently evaluated and extracted data from the  
89 included studies using a predefined, standardized protocol. The extracted data on  
90 general characteristics of studies included the first author, year of publication, years of  
91 sampling, journal of publication, sample size, study area, assay method, average  
92 concentration and standard deviation (SD). One study (28) reported ranges, which we  
93 converted to SD as described (29).  Disagreements about extracted data were resolved  
94 through discussion.

95

96 **Quality assessment**

97 Two authors (X.L.H. and Y.L.W.) independently evaluated the quality of included  
98 studies using the  **Combie evaluation tool (30) based on seven items**. Studies scoring 0–  
99 4 points were defined as low quality; those scoring 4.0–5.5 points, medium quality; and

100 those scoring 6.0–7.0 points, high quality. Differences were resolved through  
101 discussion.

102

### 103 **Statistical analysis and meta-analysis**

104 Meta-analysis was performed using STATA 15.0 software (Stata Corp, College Station,  
105 TX, USA). Pooled concentrations and 95% confidence intervals (CIs) were calculated  
106 for all outcomes. Statistical heterogeneity among studies was assessed based on  $I^2$ , with  
107 25% defined as low heterogeneity; 50%, moderate heterogeneity; and 75%, high  
108 heterogeneity (31, 32). Meta-analysis was performed using a random-effects model if  
109  $I^2 > 50%$  (33); otherwise, a fixed-effect model was used. Meta-regression was used to  
110 identify studies that might explain the observed heterogeneity; the covariates in this  
111 regression were years of sampling, study area, assay method, sample size, and quality  
112 score. Sources of heterogeneity were also explored through meta-analysis of subgroups  
113 defined by years of sampling, study area, assay method, sample size and quality score.

114

115 Sensitivity analysis was conducted by omitting studies one by one, and the P values of  
116 pooled concentrations were compared. The results were considered robust if the P  
117 values were not substantially different. Publication bias was quantitatively analyzed  
118 using Egger's test (34), and risk of bias was considered significant if  $P < 0.05$ .

119

### 120 **Health risk assessment**

121 The target hazard quotient (THQ) developed by the US Environmental Protection  
122 Agency (35) was used to assess the potential human health risks associated with long-  
123 term exposure to heavy metal pollutants in rice. The THQ was calculated as

$$124 \quad \text{THQ} = \frac{E_F \times E_D \times F_{IR} \times C}{R_{ID} \times W_{AB} \times T_A} \quad , \quad (1)$$

125

126 where  $E_F$  is the exposure frequency per year (365 days);  $E_D$ , the exposure duration (70  
127 years);  $F_{IR}$ , the average daily rice intake in  $\text{kg person}^{-1} \text{ day}^{-1}$  (0.389 for adults, 0.198  
128 for children) (27, 36);  $C$ , the heavy metal content in rice in  $\text{mg kg}^{-1}$ ;  $R_{ID}$ , the oral  
129 reference dose for heavy metals in  $\text{mg kg}^{-1} \text{ day}^{-1}$  recommended by the US  
130 Environmental Protection Agency (0.001 for Cd, 0.0035 for Pb) (35);  $W_{AB}$ , the mean  
131 body weight in China in  $\text{kg person}^{-1}$  (55.9 for adults, 32.7 for children) (27, 36); and  
132  $T_A$ , the average exposure time ( $365 \text{ days year}^{-1} \times 70 \text{ years}$ ).

133

134 Total THQ was calculated as

$$135 \quad \text{TTHQ} = \sum \text{THQ} \quad , \quad (2)$$

136 across all heavy metal pollutants, which in this study were Pb and Cd.  $\text{THQ} / \text{TTHQ} <$   
137  $1$  indicated that the food was safe for human consumption (35).

138

## 139 **Results and discussion**

### 140 **Study selection**

141 A total of 2130 articles were retrieved from PubMed, Web of Science, and

142 ScienceDirect databases, and 1561 duplicate articles were excluded. After screening  
143 titles and abstracts, we excluded another 327 articles. After carefully reading the full  
144 text of the remaining 242 articles, 212 were excluded. **Finally, 30 articles were included**  
145 **in the analysis (Fig. 1).** 

146

### 147 **Study characteristics**

148 The main characteristics of the 30 studies are presented in Table 1. The studies were  
149 **published from January 2011 to October 2021,**  and they involved a total of 6390 rice  
150 samples collected from several major rice-producing areas in China. Among the 30  
151 studies, 24 measured Pb in a total of 5440 rice samples, while 29 studies measured Cd  
152 in a total of 6359 rice samples. Concentrations of Pb were determined by inductively  
153 coupled plasma-mass spectrometry (ICP-MS, 10 studies), inductively coupled plasma  
154 optical emission spectrometry (ICP-OES, 3 studies), atomic absorption spectrometry  
155 (AAS, 11 studies), and Cd were determined by inductively coupled plasma-mass  
156 spectrometry (15 studies), atomic absorption spectrometry (14 studies).

157

### 158 **Assessment of study quality**

159 All studies in the review were judged to be of high or medium quality according to the  
160 Combie evaluation tool. The average score was 6.2 points, with 75.9% of the included  
161 studies scoring greater than 5.5 points (Table 1).

162

163 **Meta-analysis of concentrations of Pb and Cd**

164 Of the 30 studies, four were excluded for the meta-analysis of Pb because  
165 concentrations were below the limit of detection in three studies (6, 37, 38), while the  
166 SD of concentrations in a fourth study (39) was 0.000. In the remaining studies, the  
167 pooled concentration of Pb (mg/kg) across several major rice-producing areas in China  
168 was 0.10 (95% CI 0.08-0.11;  $I^2 = 99.9\%$ ,  $P < 0.001$ ; Fig. 2). The pooled concentration  
169 of Cd (mg/kg) was 0.16 (95% CI 0.14-0.18;  $I^2 = 99.4\%$ ,  $P < 0.001$ ; Fig. 3).

170

171 Although some individual studies in our review reported levels of Pb or Cd in rice that  
172 exceeded the standard limit in China (0.2 mg/kg), the meta-analysis of pooled data  
173 demonstrated that the level of each metal was below this limit.

174

175 **Publication bias and sensitivity analysis**

176 Egger's test suggested no significant risk of publication bias among studies measuring  
177 Pb ( $P = 0.712$ , Fig. 4A), whereas it suggested significant risk among studies measuring  
178 Cd ( $P = 0.005$ , Fig.4B).

179

180 Sensitivity analysis was performed by repeating the meta-analysis after omitting each  
181 study one by one and examining whether the results changed substantially. Deletion of  
182 each one of the studies did not substantially alter the pooled concentrations of Pb or Cd  
183 (Fig. S1 and S2).

184

185 **Meta-regression analysis**

186 Both uni- and multivariate meta-regressions were conducted with the following  
187 covariates: years of sampling, area, assay method, sample size and quality score.

188 Univariate meta-regression for Pb showed that years of sampling, area, assay method,  
189 sample size and quality score did not affect outcomes (Table 2). Nevertheless, assay  
190 method could explain 16.03% of heterogeneity (adjusted  $R^2 = 16.03\%$ ,  $P = 0.046$ ).

191 None of the factors tested substantially affected multivariate meta-regression (Table 3).

192

193 Univariate meta-regression for Cd identified the following characteristics as affecting  
194 outcomes: northeast vs central China (adjusted  $R^2 = 47.81\%$ ,  $P = 0.040$ ), eastern vs

195 central China (adjusted  $R^2 = 47.81\%$ ,  $P < 0.001$ ), southern vs central China (adjusted  
196  $R^2 = 47.81\%$ ,  $P = 0.007$ ), central vs non-central China (adjusted  $R^2 = 43.90\%$ ,  $P < 0.001$ ),

197 and sample size (adjusted  $R^2 = 15.56\%$ ,  $P = 0.016$ ; Table 4). In contrast, years of  
198 sampling, assay method and quality score did not affect outcomes. Multivariate meta-

199 regression showed that years of sampling, central vs non-central China, assay method,  
200 sample size and quality score were able to explain 41.86% of heterogeneity (Table 5).

201 The P value for the difference between central and non-central China was 0.002.

202

203 Meta-analysis showed high heterogeneity for Pb (99.9%) and Cd (99.4%). Uni- and

204 multivariate meta-regression associated the high heterogeneity for Cd to different study



205 areas in China.

206

### 207 **Subgroup analysis**

208 Meta-analysis was repeated for specific subgroups defined in terms of years of  
209 sampling, area, assay method, sample size and quality score. Pooled concentrations of  
210 Pb (mg/kg) were as follows for different years of sampling (Table 6, Fig. 5A): 2009-  
211 2011, 0.10 (95%CI 0.10, 0.10); 2012-2013, 0.07 (95%CI 0.05, 0.10); 2014-2015, 0.07  
212 (95%CI 0.05, 0.08); 2016, 0.19 (95%CI 0.18, 0.20); 2017, 0.09 (95%CI -0.01, 0.19);  
213 and 2018, 0.11 (95%CI 0.03, 0.18).

214

215 Pooled concentrations of Cd (mg/kg) were as follows for different years of sampling  
216 (Table 7, Fig. 5B): 2006, 0.07 (95%CI 0.05, 0.09); 2009-2011, 0.09 (95%CI 0.06, 0.11);  
217 2012-2013, 0.19 (95%CI 0.11, 0.28); 2014-2015, 0.18 (95%CI 0.15, 0.20); 2016, 0.47  
218 (95%CI 0.06, 0.89); 2017, 0.18 (95%CI 0.00, 0.37); 2018, 0.11 (95%CI 0.06, 0.16).

219

220 Regardless of years of sampling, levels of Pb were below the limit defined by China as  
221 safe. In contrast, the level of Cd exceeded the standard limit in 2016, but not in other  
222 years.

223

224 Pooled concentrations of Pb (mg/kg) were 0.26 (95%CI 0.25, 0.27) for northeast China,  
225 but 0.10 (95%CI 0.08, 0.12) across all other regions (Table 6, Fig. 6A). Pooled

226 concentrations of Cd (kg/mg) were 0.43 (95%CI 0.27, 0.60) in central China, followed  
227 by 0.21 (95%CI 0.15, 0.27) in southern China, below 0.20 in other areas and 0.13  
228 (95%CI 0.11, 0.15) across all non-central regions (Fig. 6B). Heterogeneity was high for  
229 Cd measurements in central China ( $I^2 = 96.4\%$ ) as well as non-central regions (99.5%;  
230 Table 7).

231

232 Pooled concentrations of Pb (mg/kg) were as follows for different assay methods: ICP-  
233 MS, 0.06 (95%CI 0.04, 0.09); ICP-OES, 0.13 (95%CI 0.01, 0.25); and AAS, 0.15  
234 (95%CI 0.08, 0.22) (Table 6). Pooled concentrations of Cd (mg/kg) were 0.16 (95%CI  
235 0.14, 0.18) for ICP-MS and 0.16 (95%CI 0.13, 0.20) for AAS (Table 7).

236

237 Pooled concentrations of Pb (mg/kg) were 0.10 (95%CI 0.07, 0.13) among small studies  
238 ( $\leq 150$  samples) and 0.09 (95%CI 0.07, 0.10) among large studies ( $> 150$  samples) (Table  
239 6). Pooled concentrations of Cd (mg/kg) were 0.12 (95%CI 0.10, 0.14) among small  
240 studies and 0.27 (95%CI 0.21, 0.33) among large studies (Table 7).

241

242 Among studies measuring Pb, 18 were assigned to high quality and gave a pooled  
243 concentration of 0.10 (95%CI 0.08, 0.11) mg/kg. Four studies were assigned to medium  
244 quality and gave a pooled concentration of 0.13 (95%CI -0.05, 0.30) mg/kg (Table 6).

245 Among studies measuring Cd, 24 were assigned to high quality and gave a pooled  
246 concentration of 0.19 (95%CI 0.17, 0.21) mg/kg. Nine studies were assigned to medium

247 quality and gave a pooled concentration of 0.09 (95%CI 0.05, 0.13) mg/kg (Table 7).

248

249 Our meta-analysis indicated more serious contamination of rice with Cd than with Pb.

250 Contamination with Cd appears particularly severe in the central region of China (0.43

251 mg/kg), based primarily on pooled data from Hunan (11, 40-44) but also some data

252 from Jiangxi and Hubei (13). Our findings are consistent with several studies reporting

253 widespread soil contamination with Cd in Hunan, where some types of local rice are

254 referred to as “cadmium rice” (11, 45, 46).

255

256 Although our studies sampled from all six of the major rice-producing regions in China,

257 the sampling was concentrated in Zhejiang in the Yangtze River Delta and Guangdong

258 in southern China. Given that levels of heavy metals in rice appear to vary

259 geographically (23), we recommend that future studies focus on neglected rice-

260 producing regions in China in order to provide a more comprehensive and accurate

261 picture of heavy metal contamination.

262

### 263 **Health risk assessment**

264 Our meta-analysis of the literature suggests a Pb THQ of 0.20 for adults and 0.17 for

265 children (Table 8), both of which are below 1.0, indicating safe levels in rice. In contrast,

266 the Cd THQ was 1.11 for adults and 0.97 for children, indicating a health concern for

267 adults but not children. Combining the THQs for Pb and Cd led to a total THQ higher

268 than 1 for adults and children. This suggests a serious health risk for children and adults.

269

## 270 **Conclusions**

271 Our meta-analysis suggests that pooled Pb and Cd levels are within the limits specified

272 by Chinese food safety standards. Nevertheless, the total target hazard quotient for both

273 metals appears to exceed 1.0 for adults and children, suggesting that rice consumption

274 poses a health risk and more should be done to control heavy metal pollution of soils in

275 rice paddies in China.

276

## 277 **Funding**

278 This work was supported by the National Key R&D Program of China

279 (2017YFC1602000), and the Chongqing Science and Technology Bureau

280 (cstc2021jxjl130009) and the Key demonstration project of Chongqing Technology

281 Innovation and application demonstration project (cstc2018jscx-mszdX0122).

282

## 283 **Disclosure statement**

284 No potential conflict of interest was reported by the author(s).

285

## 286 **Author Contributions**

287 Conceptualization, X.S.Y; Data curation, M.T.T and L.S.S; Formal analysis, X.L.H and

288 M.T.T; Funding acquisition, X.S.Y and X.L.H; Investigation, X.L.H; Project

289 administration, H.Y.Z; Resources, Y.L.W and G.R.F; Supervision, B.Z, S.Q.C and

290 H.Y.Z; Writing – original draft, X.L.H, B.Z and Y.L.W.

291

292 **References**

293

294 1. Ren Y, Lin M, Liu Q, Zhang Z, Fei X, Xiao R, et al. Contamination assessment,  
295 health risk evaluation, and source identification of heavy metals in the soil-rice system  
296 of typical agricultural regions on the southeast coast of China. *Environmental Science  
297 and Pollution Research*. 2021;28(10):12870-80.

298 2. Cui ZW, Wang Y, Zhao N, Yu R, Xu GH, Yu Y. Spatial distribution and risk  
299 assessment of heavy metals in paddy soils of Yongshuyu irrigation area from Songhua  
300 river basin, Northeast China. *Chin Geogr Sci*. 2018;28(5):797-809.

301 3. Tang L, Deng SH, Tan D, Long JM, Lei M. Heavy metal distribution, translocation,  
302 and human health risk assessment in the soil-rice system around Dongting Lake area,  
303 China. *Environmental Science and Pollution Research*. 2019;26(17):17655-65.

304 4. Rogan N, Serafimovski T, Dolenc M, Tasev G, Dolenc T. Heavy metal  
305 contamination of paddy soils and rice (*Oryza sativa* L.) from Koani Field (Macedonia).  
306 *Environ Geochem Health*. 2009;31(4):439-51.

307 5. Romkens P, Guo HY, Chu CL, Liu TS, Chiang CF, Koopmans GF. Prediction of  
308 Cadmium uptake by brown rice and derivation of soil-plant transfer models to improve  
309 soil protection guidelines. *Environmental Pollution*. 2009;157(8-9):2435-44.

310 6. Gao Z, Fu W, Zhang M, Zhao K, Tunney H, Guan Y. Potentially hazardous metals  
311 contamination in soil-rice system and its spatial variation in Shengzhou City, China.  
312 *Journal of Geochemical Exploration*. 2016;167:62-9.

313 7. NHCPRC. National Health Commission of the People's Republic of China. China

- 314 National Food Safety Standard Maximum Limit of Contaminants in Food (GB 2762-  
315 2017) 2017.
- 316 8. Zhai WW, Zhao WL, Yuan HH, Guo T, Hashmi MZ, Liu XM, et al. Reduced Cd,  
317 Pb, and As accumulation in rice (*Oryza sativa* L.) by a combined amendment of calcium  
318 sulfate and ferric oxide. *Environmental Science and Pollution Research*.  
319 2020;27(2):1348-58.
- 320 9. Cai LM, Wang QS, Luo J, Chen LG, Zhu RL, Wang S, et al. Heavy metal  
321 contamination and health risk assessment for children near a large Cu-smelter in central  
322 China. *Science of the Total Environment*. 2019;650:725-33.
- 323 10. Zhuang P, Sun S, Li YW, Li F, Zou B, Li YX, et al. Oral bioaccessibility and  
324 exposure risk of metal(loid)s in local residents near a mining-impacted area, Hunan,  
325 China. *International Journal of Environmental Research and Public Health*.  
326 2018;15(8):11.
- 327 11. Chen H, Yang X, Wang P, Wang Z, Li M, Zhao F-J. Dietary cadmium intake from  
328 rice and vegetables and potential health risk: A case study in Xiangtan, southern China.  
329 *Science of the Total Environment*. 2018;639:271-7.
- 330 12. Wang Q, Hao D, Wang F, Wang H, Huang X, Li F, et al. Development of a new  
331 framework to estimate the environmental risk of heavy metal(loid)s focusing on the  
332 spatial heterogeneity of the industrial layout. *Environment International*. 2021;147.
- 333 13. Liu Z, Zhang Q, Han T, Ding Y, Sun J, Wang F, et al. Heavy metal pollution in a  
334 soil-rice system in the Yangtze River region of China. *International Journal of*

335 Environmental Research and Public Health. 2016;13(1).

336 14. Huang Z, Pan XD, Wu PG, Han JL, Chen Q. Health risk assessment of heavy  
337 metals in rice to the population in Zhejiang, China. PLoS One. 2013;8(9):6.

338 15. Karalliedde L, Brooke N. Essentials of Toxicology for Health Protection.  
339 Toxicity of heavy metals and trace elements: Oxford University Press; 2013.

340 16. Liu KL, Zheng JB, Chen FS. Effects of washing, soaking and domestic cooking on  
341 cadmium, arsenic and lead bioaccessibilities in rice. J Sci Food Agric.  
342 2018;98(10):3829-35.

343 17. Godt J, Scheidig F, Grosse-Siestrup C, Esche V, Brandenburg P, Reich A, et al. The  
344 toxicity of cadmium and resulting hazards for human health. J Occup Med Toxicol.  
345 2006;1:6.

346 18. Kim KW, Thornton I. Influence of uraniferous black shales on cadmium,  
347 molybdenum and selenium in soils and crop plants in the deog-pyoung area of Korea.  
348 Environ Geochem Health. 1993;15(2-3):119-33.

349 19. ATSDR. Agency for Toxic Substances and Disease Registry. Toxicological profile  
350 for cadmium. 2012.

351 20. Flora G, Gupta D, Tiwari A. Toxicity of lead: A review with recent updates.  
352 Interdisciplinary toxicology. 2012;5(2):47-58.

353 21. Ashraf U, Kanu AS, Mo ZW, Hussain S, Anjum SA, Khan I, et al. Lead toxicity in  
354 rice: effects, mechanisms, and mitigation strategies-a mini review. Environmental  
355 Science and Pollution Research. 2015;22(23):18318-32.



- 356 22. Norton GJ, Williams PN, Adomako EE, Price AH, Zhu YG, Zhao FJ, et al. Lead in  
357 rice: Analysis of baseline lead levels in market and field collected rice grains. *Science*  
358 *of the Total Environment*. 2014;485:428-34.
- 359 23. Fang Y, Sun X, Yang W, Ma N, Xin Z, Fu J, et al. Concentrations and health risks  
360 of lead, cadmium, arsenic, and mercury in rice and edible mushrooms in China. *Food*  
361 *Chemistry*. 2014;147:147-51.
- 362 24. Xie LH, Tang SQ, Wei XJ, Shao GN, Jiao GA, Sheng ZH, et al. The cadmium and  
363 lead content of the grain produced by leading Chinese rice cultivars. *Food Chemistry*.  
364 2017;217:217-24.
- 365 25. Mu T, Wu T, Zhou T, Li Z, Ouyang Y, Jiang J, et al. Geographical variation in  
366 arsenic, cadmium, and lead of soils and rice in the major rice producing regions of  
367 China. *Science of the Total Environment*. 2019;677:373-81.
- 368 26. Kong X, Liu T, Yu Z, Chen Z, Lei D, Wang Z, et al. Heavy Metal Bioaccumulation  
369 in Rice from a High Geological Background Area in Guizhou Province, China.  
370 *International Journal of Environmental Research and Public Health*. 2018;15(10).
- 371 27. Zheng N, Wang Q, Zhang X, Zheng D, Zhang Z, Zhang S. Population health risk  
372 due to dietary intake of heavy metals in the industrial area of Huludao city, China.  
373 *Science of the Total Environment*. 2007;387(1-3):96-104.
- 374 28. Lian M, Wang J, Sun L, Xu Z, Tang J, Yan J, et al. Profiles and potential health  
375 risks of heavy metals in soil and crops from the watershed of Xi River in Northeast  
376 China. *Ecotoxicology and Environmental Safety*. 2019;169:442-8.

- 377 29. Hozo SP, Djulbegovic B, Hozo I. Estimating the mean and variance from the  
378 median, range, and the size of a sample. *BMC medical research methodology*.  
379 2005;5:13.
- 380 30. Si YH, Wang CY, Guo Y, Yin H, Ma Y. Prevalence of osteoporosis in patients with  
381 type 2 diabetes mellitus in the Chinese mainland A protocol of systematic review and  
382 meta-analysis. *Medicine*. 2020;99(16):5.
- 383 31. Zhou ZK, Liang YF, Zhang XQ, Xu JJ, Lin JY, Zhang RW, et al. Low-density  
384 Lipoprotein Cholesterol and Alzheimer's disease: A systematic review and meta-  
385 analysis. *Front Aging Neurosci*. 2020;12:11.
- 386 32. Higgins JPT, Thompson SG, Deeks JJ, Altman DG. Measuring inconsistency in  
387 meta-analyses. *Br Med J*. 2003;327(7414):557-60.
- 388 33. Higgins JPT, Thompson SG. Quantifying heterogeneity in a meta-analysis. *Stat*  
389 *Med*. 2002;21(11):1539-58.
- 390 34. Egger M, Smith GD, Schneider M, Minder C. Bias in meta-analysis detected by a  
391 simple, graphical test. *BMJ-British Medical Journal*. 1997;315(7109):629-34.
- 392 35. EPA U. Risk-based concentration table. United States Environmental Protection  
393 Agency Washington DC, Philadelphia. 2000.
- 394 36. Khan S, Cao Q, Zheng YM, Huang YZ, Zhu YG. Health risks of heavy metals in  
395 contaminated soils and food crops irrigated with wastewater in Beijing, China.  
396 *Environmental Pollution*. 2008;152(3):686-92.
- 397 37. He M, Shen H, Li Z, Wang L, Wang F, Zhao K, et al. Ten-year regional monitoring

398 of soil-rice grain contamination by heavy metals with implications for target  
399 remediation and food safety. *Environmental Pollution*. 2019;244:431-9.

400 38. Zhao K, Fu W, Ye Z, Zhang C. Contamination and spatial variation of heavy metals  
401 in the soil-rice system in Nanxun county, Southeastern China. *International Journal of*  
402 *Environmental Research and Public Health*. 2015;12(2):1577-94.

403 39. Li Z, Su H, Wang L, Hu D, Zhang L, Fang J, et al. Epidemiological Study on Metal  
404 Pollution of Ningbo in China. *International Journal of Environmental Research and*  
405 *Public Health*. 2018;15(3).

406 40. Mao C, Song Y, Chen L, Ji J, Li J, Yuan X, et al. Human health risks of heavy  
407 metals in paddy rice based on transfer characteristics of heavy metals from soil to rice.  
408 *Catena*. 2019;175:339-48.

409 41. Lu A, Li B, Li J, Chen W, Xu L. Heavy metals in paddy soil-rice systems of  
410 industrial and township areas from subtropical China: Levels, transfer and health risks.  
411 *Journal of Geochemical Exploration*. 2018;194:210-7.

412 42. Zeng F, Wei W, Li M, Huang R, Yang F, Duan Y. Heavy metal contamination in  
413 rice-producing soils of Hunan province, China and potential health risks. *International*  
414 *Journal of Environmental Research and Public Health*. 2015;12(12):15584-93.

415 43. Zhang Z, Zhang N, Li H, Lu Y, Yang Z. Potential health risk assessment for  
416 inhabitants posed by heavy metals in rice in Zijiang River basin, Hunan Province, China.  
417 *Environmental Science and Pollution Research*. 2020;27(19):24013-24.

418 44. Du F, Yang Z, Liu P, Wang L. Accumulation, translocation, and assessment of

419 heavy metals in the soil-rice systems near a mine-impacted region. *Environmental*  
420 *Science and Pollution Research*. 2018;25(32):32221-30.

421 45. Zhao F-J, Ma Y, Zhu Y-G, Tang Z, McGrath SP. Soil contamination in China:  
422 Current status and mitigation strategies. *Environmental Science & Technology*.  
423 2015;49(2):750-9.

424 46. Zhu H, Chen C, Xu C, Zhu Q, Huang D. Effects of soil acidification and liming on  
425 the phytoavailability of cadmium in paddy soils of central subtropical China.  
426 *Environmental Pollution*. 2016;219:99-106.

427

**Table 1. Main characteristics of studies included in the meta-analysis**

| No. | Study             | Year(s) of sampling | Area                                                                | Sample size | Level (mg/kg dry weight), mean±SD |               | Assay method              | Quality (Combie points) |
|-----|-------------------|---------------------|---------------------------------------------------------------------|-------------|-----------------------------------|---------------|---------------------------|-------------------------|
|     |                   |                     |                                                                     |             | Pb                                | Cd            |                           |                         |
| 1   | Zhao et al., 2011 | 2006                | Zhejiang (Wenling)<br>Northeast/Northern<br>China/Northwest/Eastern | 96          | NR                                | 0.072±0.105   | GFAAS                     | Medium (5.5)            |
| 2   | Hu et al., 2013   | 2009-2011           | China/Central<br>China/Southern<br>China/Southwest                  | 92          | 0.10±0.14                         | 0.08±0.07     | GFAAS                     | High (6.5)              |
| 3   | Li et al., 2014   | 2011                | Zhejiang (Wenling)<br>Yangtze River Delta                           | 219         | NR                                | 0.132±0.24    | GFAAS                     | High (6.5)              |
| 4   | Mao et al., 2019  | 2011                | (Jiangsu, Zhejiang,<br>Shanghai)<br>Yangtze River Region            | 137         | 0.098±0.003                       | 0.064±0.008   | ICP-MS                    | High (6.5)              |
| 5   | Liu et al., 2016  | 2012                | (Hubei, Hunan, Jiangxi)                                             | 101         | 0.25±0.11                         | 0.29±0.39     | GFAAS                     | High (6.0)              |
| 6   | Xie et al., 2017  | 2012-2013           | 18 provinces                                                        | 110         | 0.0435±0.0755                     | 0.0650±0.1266 | GFAAS                     | High (6.5)              |
| 7   | Gao et al., 2016  | 2013                | Zhejiang (Shengzhou)                                                | 94          | UD                                | 0.09±0.10     | GFAAS                     | High (6.5)              |
| 8   | Hu et al., 2019   | 2013                | South of Yangtze River<br>Delta (Zhejiang)                          | 915         | 0.060±0.08                        | 0.08±0.07     | Pb: ICP-OES<br>Cd: ICP-MS | High (6.5)              |

| No. | Study              | Year(s) of sampling | Area                                                  | Sample size                 | Level (mg/kg dry weight), mean±SD |                            | Assay method              | Quality (Combie points) |
|-----|--------------------|---------------------|-------------------------------------------------------|-----------------------------|-----------------------------------|----------------------------|---------------------------|-------------------------|
|     |                    |                     |                                                       |                             | Pb                                | Cd                         |                           |                         |
| 9   | Lu et al., 2018    | 2013                | Hunan                                                 | 440                         | 0.049±0.004                       | 0.565±0.376                | AAS                       | High (6.0)              |
| 10  | Li et al., 2018    | 2013                | Yangtze River Delta region (Ningbo)                   | Rural: 10<br>Industrial: 10 | 0.027±0.034                       | 0.071±0.061                | ICP-MS                    | Medium (5.5)            |
| 11  | Zeng et al., 2015  | 2013                | Hunan                                                 | 28                          | 0.022±0.021                       | 0.312±0.434                | GFAAS                     | High (6.0)              |
| 12  | Tang et al., 2021  | 2014                | Guangxi (Liujiang District, Southern part of Liuzhou) | 75                          | NR                                | 0.16±0.22                  | ICP-MS                    | High (6.5)              |
| 13  | Zheng et al., 2020 | 2014                | Pearl River Delta                                     | 879                         | 0.27±0.59                         | 0.17±0.20                  | Pb: FAAS<br>Cd: GFAAS     | High (6.5)              |
| 14  | Huang et al., 2018 | 2014-2015           | Southeast China (Zhejiang)                            | 32                          | 0.18±0.08                         | 0.21±0.07                  | Pb: ICP-OES<br>Cd: ICP-MS | High (6.5)              |
| 15  | Gu et al., 2019    | 2015                | Guangxi (Nanning and Laibin)                          | 246                         | 0.042±0.020                       | 0.182±0.171                | ICP-MS                    | High (6.5)              |
| 16  | Mu et al., 2019    | 2015                | 19 provinces South/ Yangtze River Delta /West         | 113<br>574                  | 0.036±0.021<br>0.036±0.017        | 0.087±0.174<br>0.199±0.406 | ICP-MS                    | High (6.5)              |
| 17  | Ma et al., 2017    | 2015                | Guangdong                                             | 48                          | 0.0274±0.0202                     | 0.231±0.222                | ICP-MS                    | High (6.0)              |
| 18  | Chen et al., 2018  | 2016                | Hunan (Xiangtan)                                      | 200                         | NR                                | 0.69±0.60                  | ICP-MS                    | High (6.5)              |

| No. | Study              | Year(s) of sampling | Area                                  | Sample size   | Level (mg/kg dry weight), mean±SD |             | Assay method          | Quality (Combie points) |
|-----|--------------------|---------------------|---------------------------------------|---------------|-----------------------------------|-------------|-----------------------|-------------------------|
|     |                    |                     |                                       |               | Pb                                | Cd          |                       |                         |
| 19  | He et al., 2019    | 2016                | Zhejiang (Wenling)                    | 169           | UD                                | 0.117±0.189 | GFAAS                 | High (6.5)              |
| 20  | Wang et al., 2021  | 2016                | Guangdong (Shaoguan)                  | 570           | 0.19±0.092                        | 0.62±0.94   | Pb: FAAS<br>Cd: GFAAS | High (6.5)              |
| 21  | Ren et al., 2021   | 2017                | Northern part of Zhejiang province    | 120           | 0.04 ±0.05                        | 0.09±0.07   | ICP-MS                | High (6.0)              |
| 22  | Zhang et al., 2020 | 2017                | Central part of Hunan                 | 135           | 0.145±0.328                       | 0.283±0.330 | ICP-MS                | High (6.5)              |
| 23  | Guo et al., 2020   | 2018                | Centre of Zhejiang (Jin-Qu Basin)     | 86            | 0.148±0.094                       | 0.163±0.206 | ICP-MS                | High (7.0)              |
| 24  | Liu et al., 2020   | 2018                | Pearl River Delta (Zhuhai)            | 70            | NR                                | 0.12±0.08   | ICP-MS                | High (6.0)              |
| 25  | Lu et al., 2021    | 2018                | Southwest of Fujian (Longyang)        | 332           | 0.072±0.085                       | 0.064±0.075 | ICP-MS                | High (7.0)              |
| 26  | Du et al., 2018    | NR                  | Hunan (Southern part of Changsha)     | 27            | 0.031±0.023                       | 0.291±0.295 | ICP-MS                | Medium (5.0)            |
| 27  | Lian et al., 2019  | NR                  | Shenyang                              | 41            | 0.26±0.026                        | 0.14±0.016  | GFAAS                 | Medium (5.5)            |
| 28  | Yu et al., 2019    | NR                  | Zhejiang (Nanxun, Shengzhou, Wenling) | Nanxun: 100   | NR                                | 0.011±0.015 | GFAAS                 | Medium (5.0)            |
|     |                    |                     |                                       | Shengzhou: 94 | NR                                | 0.09±0.10   |                       |                         |
|     |                    |                     |                                       | Wenling: 96   | NR                                | 0.072±0.105 |                       |                         |

| No. | Study              | Year(s) of sampling | Area              | Sample size | Level (mg/kg dry weight), mean±SD |             | Assay method | Quality (Combie points) |
|-----|--------------------|---------------------|-------------------|-------------|-----------------------------------|-------------|--------------|-------------------------|
|     |                    |                     |                   |             | Pb                                | Cd          |              |                         |
| 29  | Zhang et al., 2018 | NR                  | Guangdong (Sihui) | 31          | 2.05±4.67                         | NR          | ICP-OES      | Medium (5.5)            |
| 30  | Zhao et al., 2015  | NR                  | Zhejiang (Nanxun) | 100         | UD                                | 0.011±0.015 | GFAAS        | Medium (5.5)            |

AAS, atomic absorption spectrometry; FAAS, flame atomic absorption spectrometry; GFAAS, graphite furnace atomic absorption spectrometry; ICP,

inductively coupled plasma; MS, mass spectrometry; NR, not reported; OES, optical emission spectroscopy; UD, undetectable (below the detection limit).



**Table 2. Univariate meta-regression for Pb**

| Covariate                | Coefficient | 95% confidence interval  | Adjusted R <sup>2</sup> | P     |
|--------------------------|-------------|--------------------------|-------------------------|-------|
| <b>Years of sampling</b> | 0.0065976   | -0.0196145 to 0.0328096  | -4.36%                  | 0.602 |
| <b>Area of China</b>     |             |                          |                         |       |
| E vs N                   | -0.1681435  | -0.3993931 to 0.0631061  | 2.31%                   | 0.141 |
| C vs N                   | -0.161892   | -0.3967119 to 0.0729279  | 2.31%                   | 0.161 |
| S vs N                   | -0.1370138  | -0.3715523 to 0.0975248  | 2.31%                   | 0.231 |
| N vs non-N               | 0.1567184   | -0.045606 to -0.045606   | 14.13%                  | 0.120 |
| <b>Assay method</b>      |             |                          |                         |       |
| ICP-MS vs AAS            | -0.0842295  | -0.1668027 to -0.0016563 | 16.03%                  | 0.046 |
| ICP-OES vs AAS           | -0.0201361  | -0.1604507 to 0.1201785  | 16.03%                  | 0.767 |
| <b>Sample size</b>       | 0.0000177   | -0.091281 to 0.0913164   | -5.42%                  | 1.000 |
| <b>Quality score</b>     | -0.0134979  | -0.1359797 to 0.1089838  | -5.34%                  | 0.821 |

Regions of China were classified as follows: E, eastern (Zhejiang, Jiangsu, Shanghai); N, northeast (Liaoning); C, central (Hubei, Hunan, Jiangxi); S, southern (Guangxi, Guangdong, Fujian).

AAS, atomic absorption spectrometry; ICP, inductively coupled plasma; MS, mass spectrometry; OES, optical emission spectrometry.

**Table 3. Multivariate meta-regression for Pb**

| Covariate                | Coefficient | 95% confidence interval | Adjusted R <sup>2</sup> | P     |
|--------------------------|-------------|-------------------------|-------------------------|-------|
| <b>Years of sampling</b> | 0.0186612   | -0.0203312 to 0.0576536 |                         | 0.307 |
| <b>Assay method</b>      |             |                         |                         |       |
| ICP-MS vs AAS            | -0.1118847  | -0.2457248 to 0.0219555 | -3.89%                  | 0.091 |
| ICP-OES vs AAS           | -0.036351   | -0.1967322 to 0.1240303 |                         | 0.620 |
| <b>Sample size</b>       | -0.0305863  | -0.1400625 to 0.0788899 |                         | 0.543 |
| <b>Quality score</b>     | 0.0229515   | -0.198218 to 0.2441209  |                         | 0.820 |

Assay methods are defined in Table 2.

**Table 4. Univariate meta-regression for Cd**

| Covariate                | Coefficient | 95% confidence interval  | Adjusted R <sup>2</sup> | P     |
|--------------------------|-------------|--------------------------|-------------------------|-------|
| <b>Years of sampling</b> | 0.0152284   | -0.0275551 to 0.0580119  | -2.00%                  | 0.470 |
| <b>Area of China</b>     |             |                          |                         |       |
| N vs C                   | -0.2968999  | -0.5788897 to -0.0149101 | 47.81%                  | 0.040 |
| E vs C                   | -0.3322005  | -0.4702123 to -0.1941887 | 47.81%                  | 0.000 |
| S vs C                   | -0.2211105  | -0.3775602 to -0.0646608 | 47.81%                  | 0.007 |
| C vs non-C               | 0.2980667   | 0.1612039 to 0.4349295   | 43.90%                  | 0.000 |
| <b>Assay method</b>      | -0.0071547  | -0.1240696 to 0.1097602  | -3.38%                  | 0.901 |
| <b>Sample size</b>       | 0.1437373   | 0.0285398 to 0.2589348   | 15.56%                  | 0.016 |
| <b>Quality score</b>     | 0.1109727   | -0.0133534 to 0.2352988  | 7.26%                   | 0.078 |

Abbreviations for regions of China are defined in Table 2.

**Table 5. Multivariate meta-regression for Cd**

| Covariate                    | Coefficient | 95% confidence interval | Adjusted R <sup>2</sup> | P     |
|------------------------------|-------------|-------------------------|-------------------------|-------|
| Years of sampling            | 0.0092293   | -0.0370372 to 0.0554958 |                         | 0.679 |
| Area: central vs non-central | 0.2869248   | 0.1182071 to 0.4556425  |                         | 0.002 |
| Assay method                 | 0.0520104   | -0.0969596 to 0.2009805 | 41.86%                  | 0.471 |
| Sample size                  | 0.0768156   | -0.0605715 to 0.2142028 |                         | 0.254 |
| Quality score                | 0.024864    | -0.1877351 to 0.2374632 |                         | 0.808 |

**Table 6. Subgroup analysis of Pb concentrations in rice.**

| Stratifying variable | Subgroup       | No. of studies | Sample size | Concentration, mg/kg (95%CI) | P      | I <sup>2</sup> (%) |
|----------------------|----------------|----------------|-------------|------------------------------|--------|--------------------|
| Years of sampling    | 2009-2011      | 2              | 229         | 0.10 (0.10, 0.10)            | 0.891  | 0.0                |
|                      | 2012-2013      | 6              | 1604        | 0.07 (0.05, 0.10)            | <0.001 | 98.8               |
|                      | 2014-2015      | 6              | 1892        | 0.07 (0.05, 0.08)            | <0.001 | 98.1               |
|                      | 2016           | 1              | 570         | 0.19 (0.18, 0.20)            | /      | /                  |
|                      | 2017           | 2              | 255         | 0.09 (-0.01, 0.19)           | <0.001 | 92.6               |
|                      | 2018           | 2              | 418         | 0.11 (0.03, 0.18)            | <0.001 | 97.8               |
|                      | Not reported   | 3              | 99          | 0.18 (-0.04, 0.40)           | <0.001 | 99.9               |
| Area of China        | Multiple areas | 4              | 889         | 0.04 (0.03, 0.05)            | <0.001 | 85.2               |
|                      | Northeast      | 1              | 41          | 0.26 (0.25, 0.27)            | /      | /                  |
|                      | Eastern        | 6              | 1300        | 0.09 (0.06, 0.12)            | <0.001 | 98.9               |
|                      | Central        | 5              | 731         | 0.09 (0.06, 0.13)            | <0.001 | 99.0               |
|                      | Southern       | 6              | 2106        | 0.12 (0.06, 0.18)            | <0.001 | 99.7               |
|                      | Northeast      | 1              | 41          | 0.26 (0.25, 0.27)            | /      | /                  |
|                      | Non-Northeast  | 17             | 4137        | 0.10 (0.08, 0.12)            | <0.001 | 99.9               |
| Assay method         | ICP-MS         | 11             | 1828        | 0.06 (0.04, 0.09)            | <0.001 | 99.9               |
|                      | ICP-OES        | 3              | 978         | 0.13 (0.01, 0.25)            | <0.001 | 97.3               |
|                      | AAS            | 8              | 2261        | 0.15 (0.08, 0.22)            | <0.001 | 99.8               |
| Sample size          | ≤150           | 15             | 1111        | 0.10 (0.07, 0.13)            | <0.001 | 99.7               |
|                      | >150           | 7              | 3956        | 0.09 (0.07, 0.10)            | <0.001 | 99.7               |
| Quality score        | High           | 18             | 4958        | 0.10 (0.08, 0.11)            | <0.001 | 99.9               |
|                      | Medium         | 4              | 109         | 0.13 (-0.05, 0.30)           | <0.001 | 99.8               |

Areas of China and assay methods are defined in Table 2.

**Table 7. Subgroup analysis of Cd concentrations in rice.**

| <b>Stratifying variable</b> | <b>Subgroup</b> | <b>No. of studies</b> | <b>Sample size</b> | <b>Concentration<br/>95%CI</b> | <b>P</b> | <b>I<sup>2</sup> (%)</b> |
|-----------------------------|-----------------|-----------------------|--------------------|--------------------------------|----------|--------------------------|
| Years of sampling           | 2006            | 1                     | 96                 | 0.07 (0.05, 0.09)              | /        | /                        |
|                             | 2009-2011       | 3                     | 448                | 0.09 (0.06, 0.11)              | <0.001   | 91.0                     |
|                             | 2012-2013       | 8                     | 1708               | 0.19 (0.11, 0.28)              | <0.001   | 99.1                     |
|                             | 2014-2015       | 7                     | 1967               | 0.18 (0.15, 0.20)              | <0.001   | 86.1                     |
|                             | 2016            | 3                     | 939                | 0.47 (0.06, 0.89)              | <0.001   | 99.3                     |
|                             | 2017            | 2                     | 255                | 0.18 (-0.00, 0.37)             | <0.001   | 97.7                     |
|                             | 2018            | 3                     | 488                | 0.11 (0.06, 0.16)              | <0.001   | 95.6                     |
| Area of China               | Not reported    | 6                     | 458                | 0.09 (0.04, 0.14)              | <0.001   | 99.8                     |
|                             | Multiple areas  | 4                     | 889                | 0.11 (0.06, 0.15)              | <0.001   | 93.7                     |
|                             | Northeast       | 1                     | 41                 | 0.14 (0.14, 0.14)              | /        | /                        |
|                             | Eastern         | 16                    | 2379               | 0.10 (0.08, 0.12)              | <0.001   | 99.4                     |
|                             | Central         | 5                     | 830                | 0.43 (0.27, 0.60)              | <0.001   | 96.4                     |
|                             | Southern        | 7                     | 2220               | 0.21 (0.15, 0.27)              | <0.001   | 98.6                     |
| Assay method                | Non-Central     | 24                    | 4640               | 0.13 (0.11, 0.15)              | <0.001   | 99.5                     |
|                             | ICP-MS          | 17                    | 3130               | 0.16 (0.14, 0.18)              | <0.001   | 97.9                     |
|                             | AAS             | 16                    | 3229               | 0.16 (0.13, 0.20)              | <0.001   | 99.6                     |
| Sample size                 | ≤150            | 23                    | 1815               | 0.12 (0.10, 0.14)              | <0.001   | 99.4                     |
|                             | >150            | 10                    | 4544               | 0.27 (0.21, 0.33)              | <0.001   | 99.4                     |
| Quality score               | High            | 24                    | 5785               | 0.19 (0.17, 0.21)              | <0.001   | 98.9                     |
|                             | Medium          | 9                     | 574                | 0.09 (0.05, 0.13)              | <0.001   | 99.7                     |

Areas of China and assay methods are defined in Table 2.

**Table 8. THQ and total THQ of Pb and Cd due to rice consumption**

| Group    | Pb-THQ | Cd-THQ | Total THQ |
|----------|--------|--------|-----------|
| Adults   | 0.20   | 1.11   | 1.31      |
| Children | 0.17   | 0.97   | 1.14      |

THQ, target hazard quotient.

## Figure captions

Figure 1 Flow diagram of study inclusion in the meta-analysis.

Figure 2 Meta-analysis of Pb concentrations in rice.

Figure 3 Meta-analysis of Cd concentrations in rice.

Figure 4 Egger's test to assess risk of publication bias among studies measuring (A) Pb or (B) Cd in rice samples.

Figure 5 Pooled concentrations of (A) Pb and (B) Cd in different years of sampling. The dashed line indicates the safety limit defined by the Chinese government. dw, dry weight.

Figure 6 Pooled concentrations of (A) Pb and (B) Cd in different areas of China. Regions of China are defined as in Table 2. ✦ indicates exceed the standard limit.



**Figure 1**

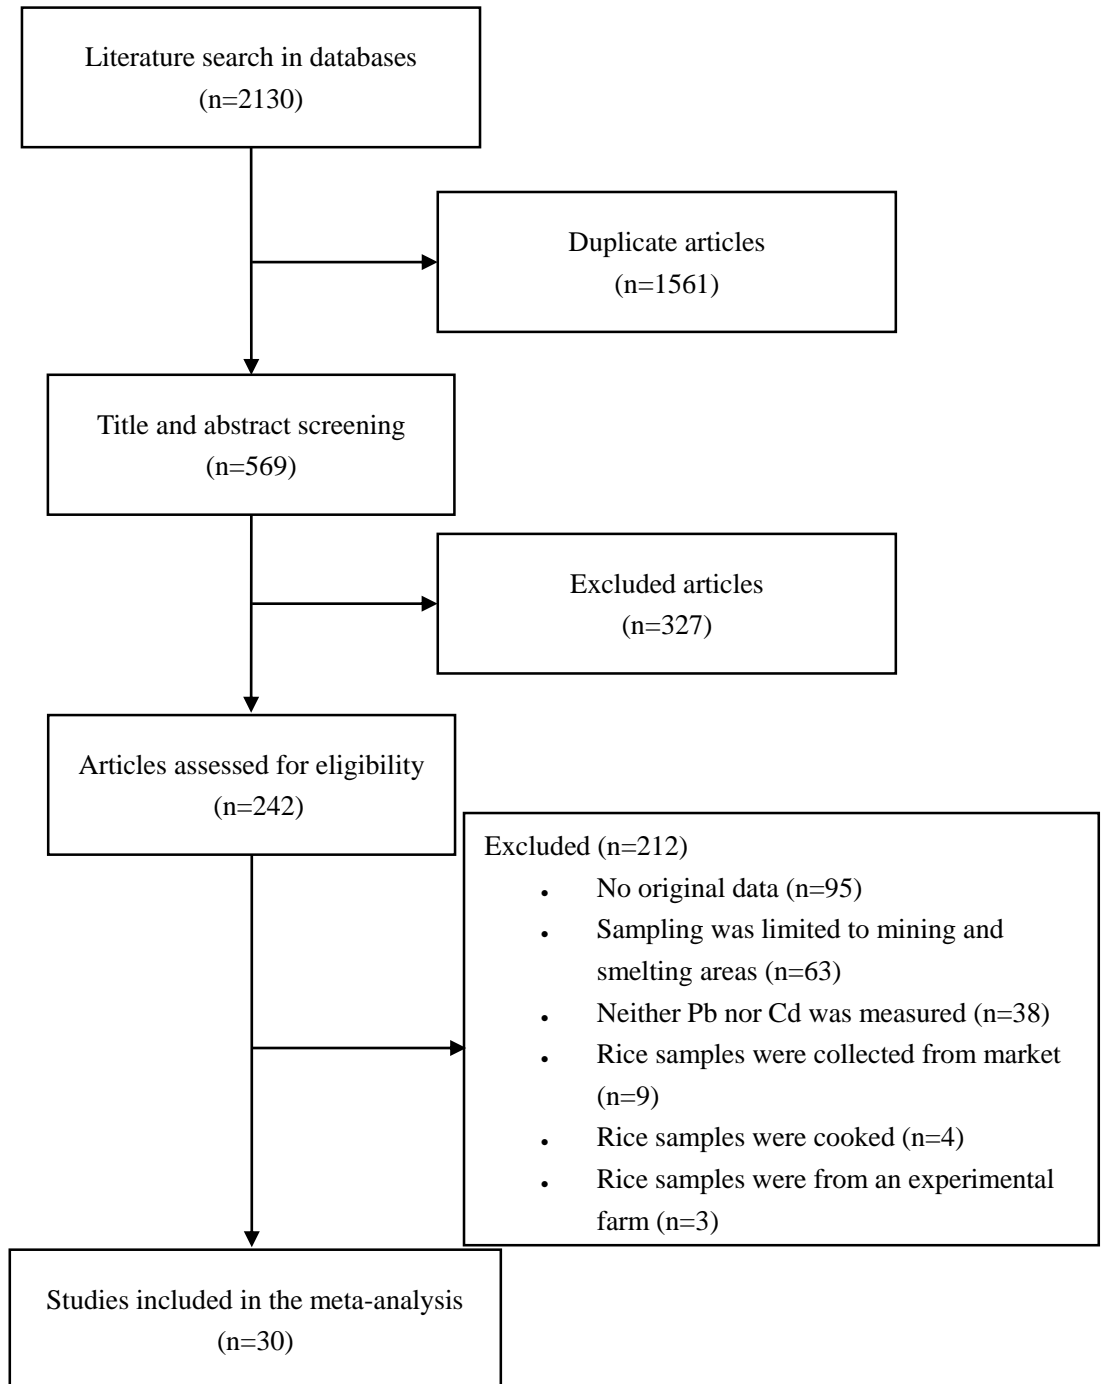

**Figure 2**

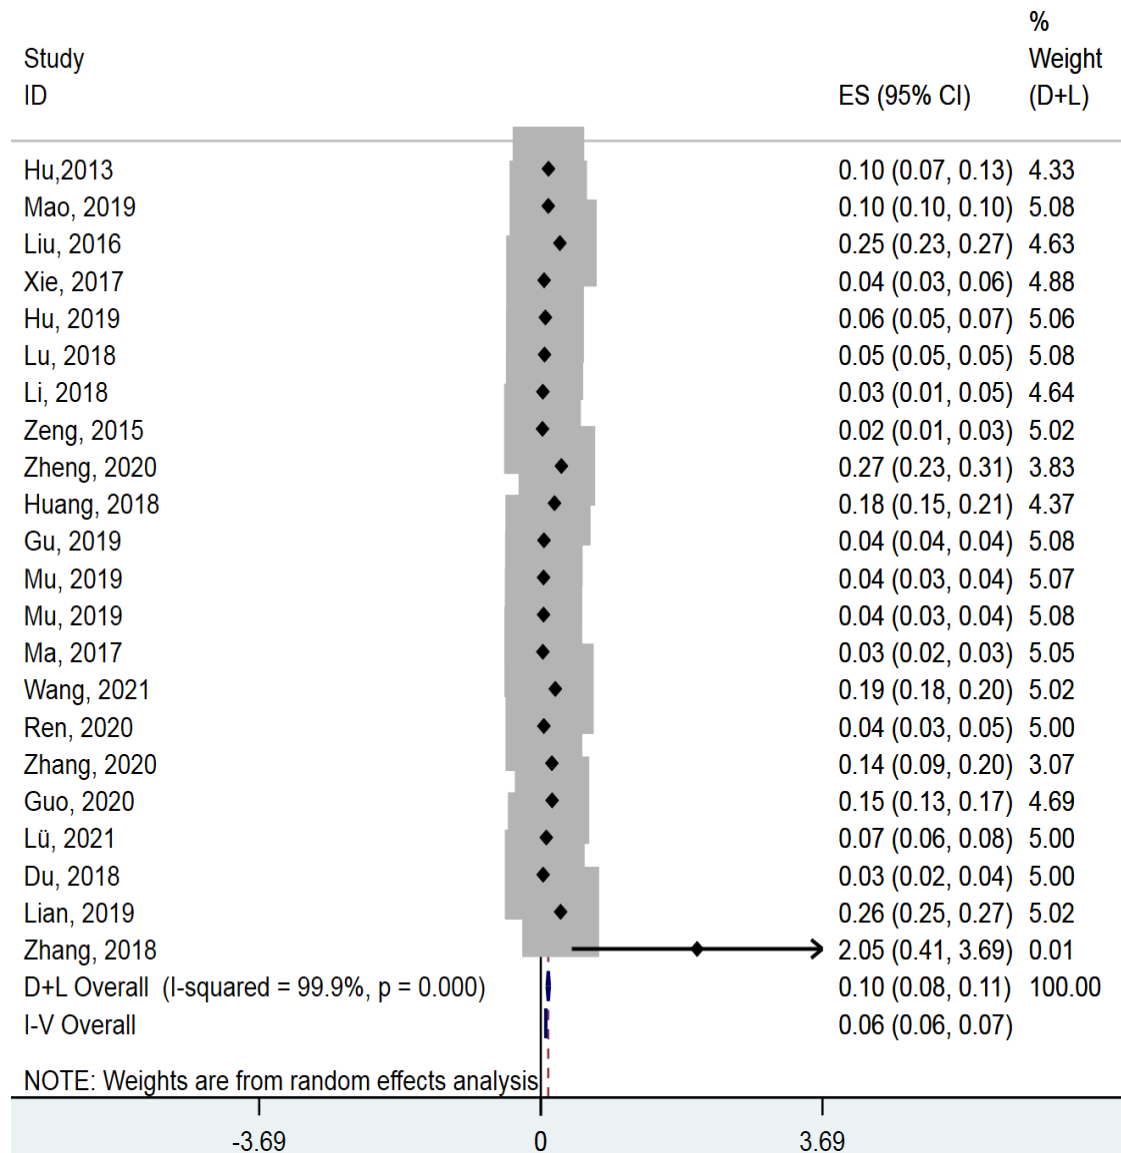

**Figure 3**

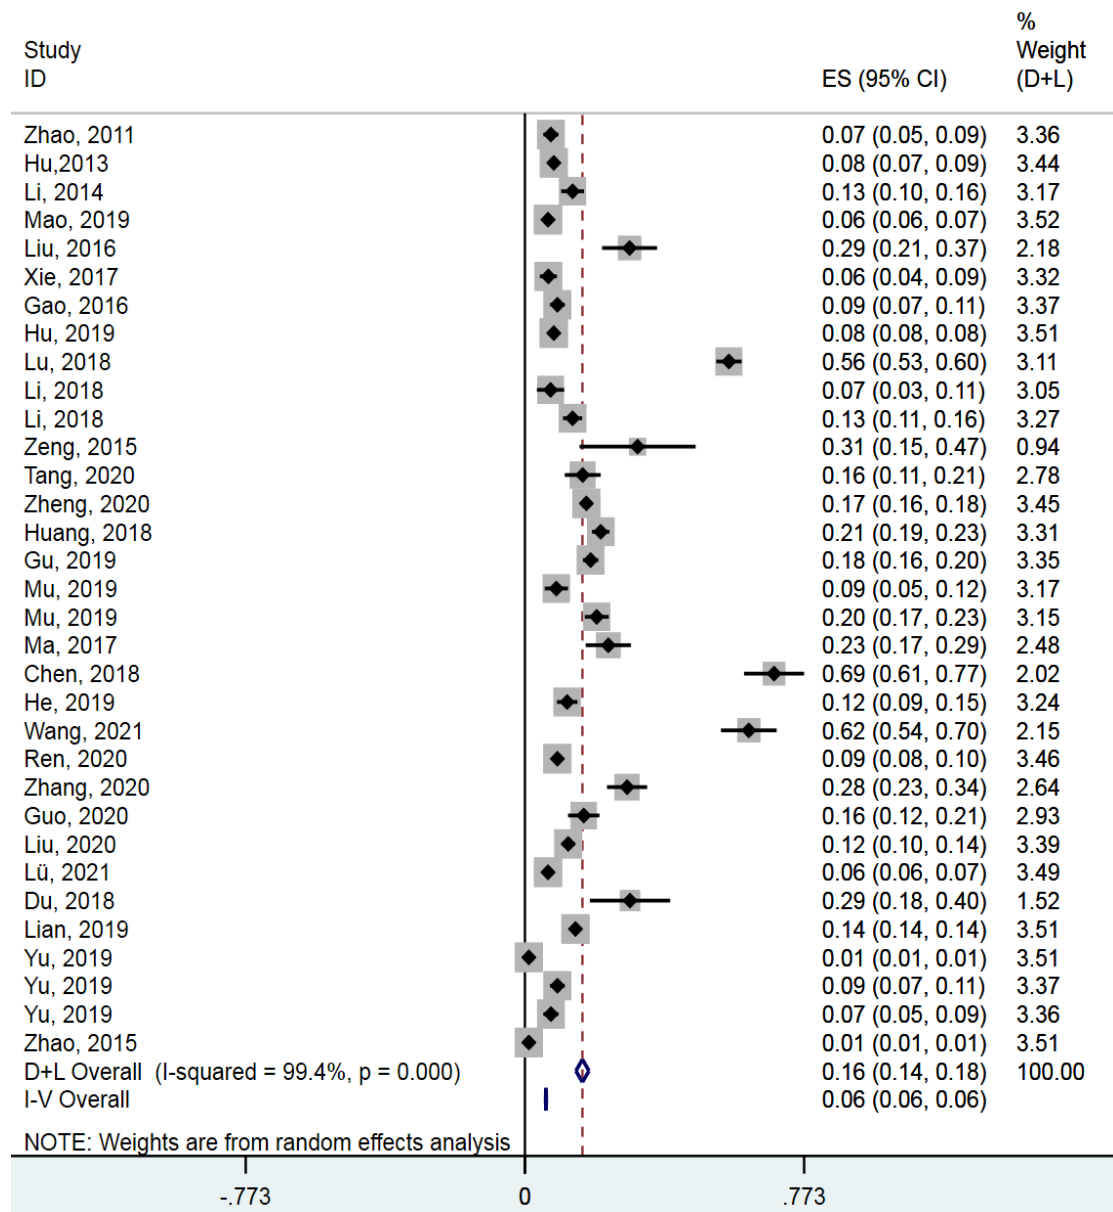

**Figure 4**

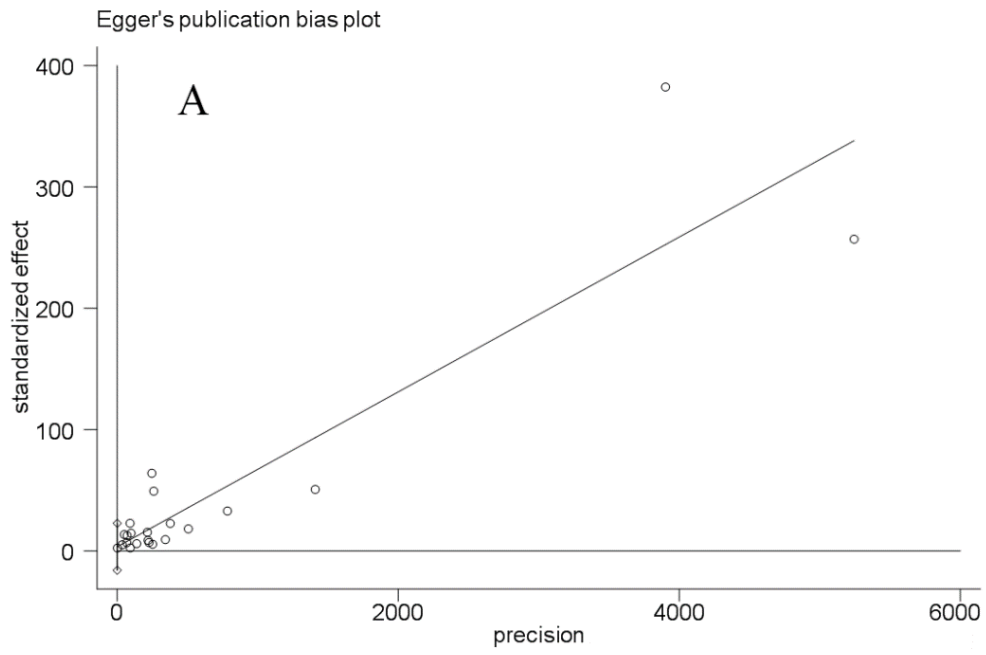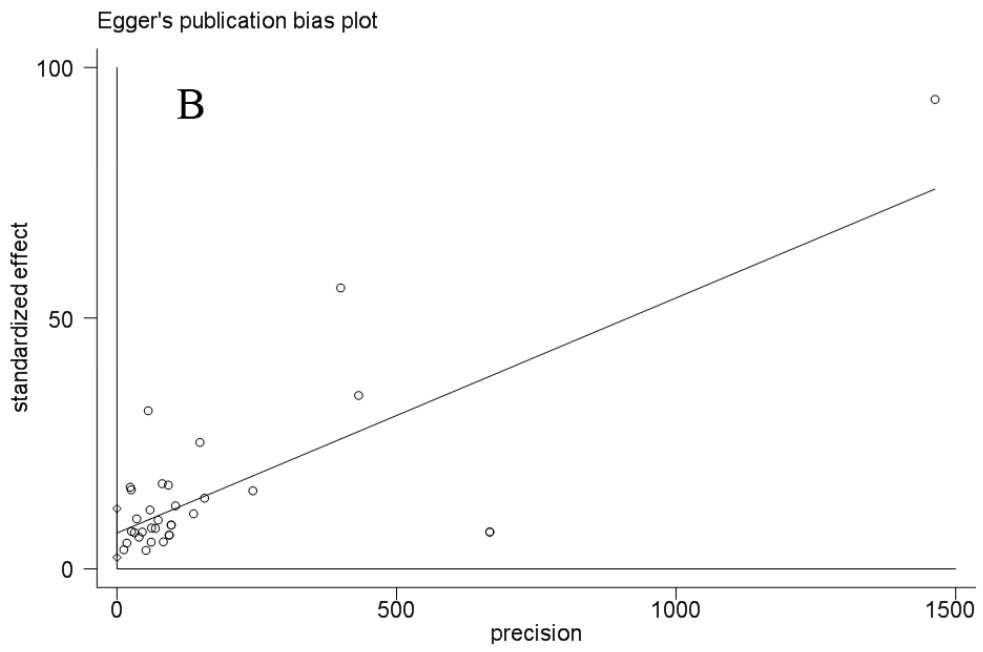

**Figure 5**

**A**

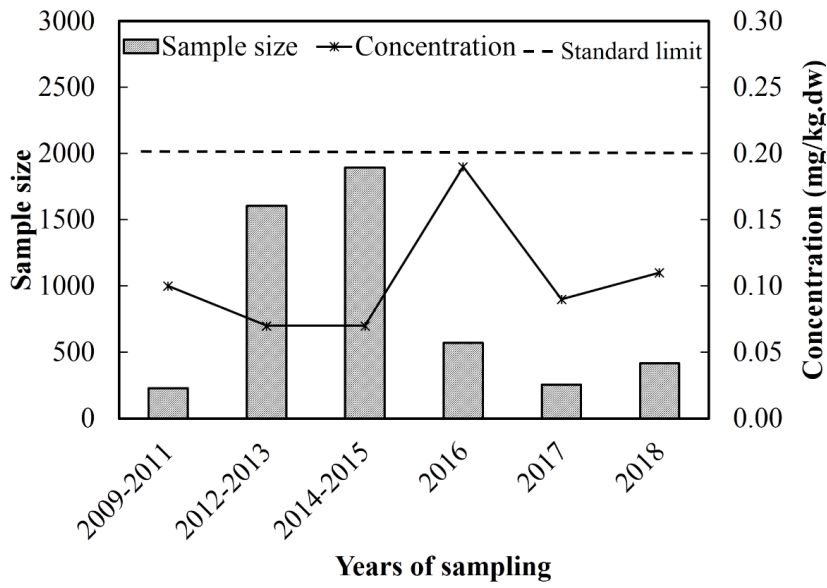

**B**

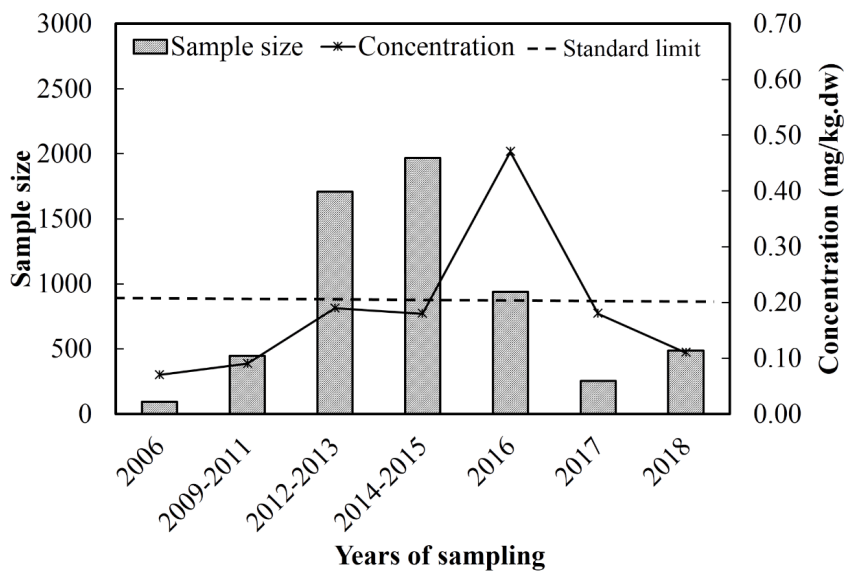

Figure 6

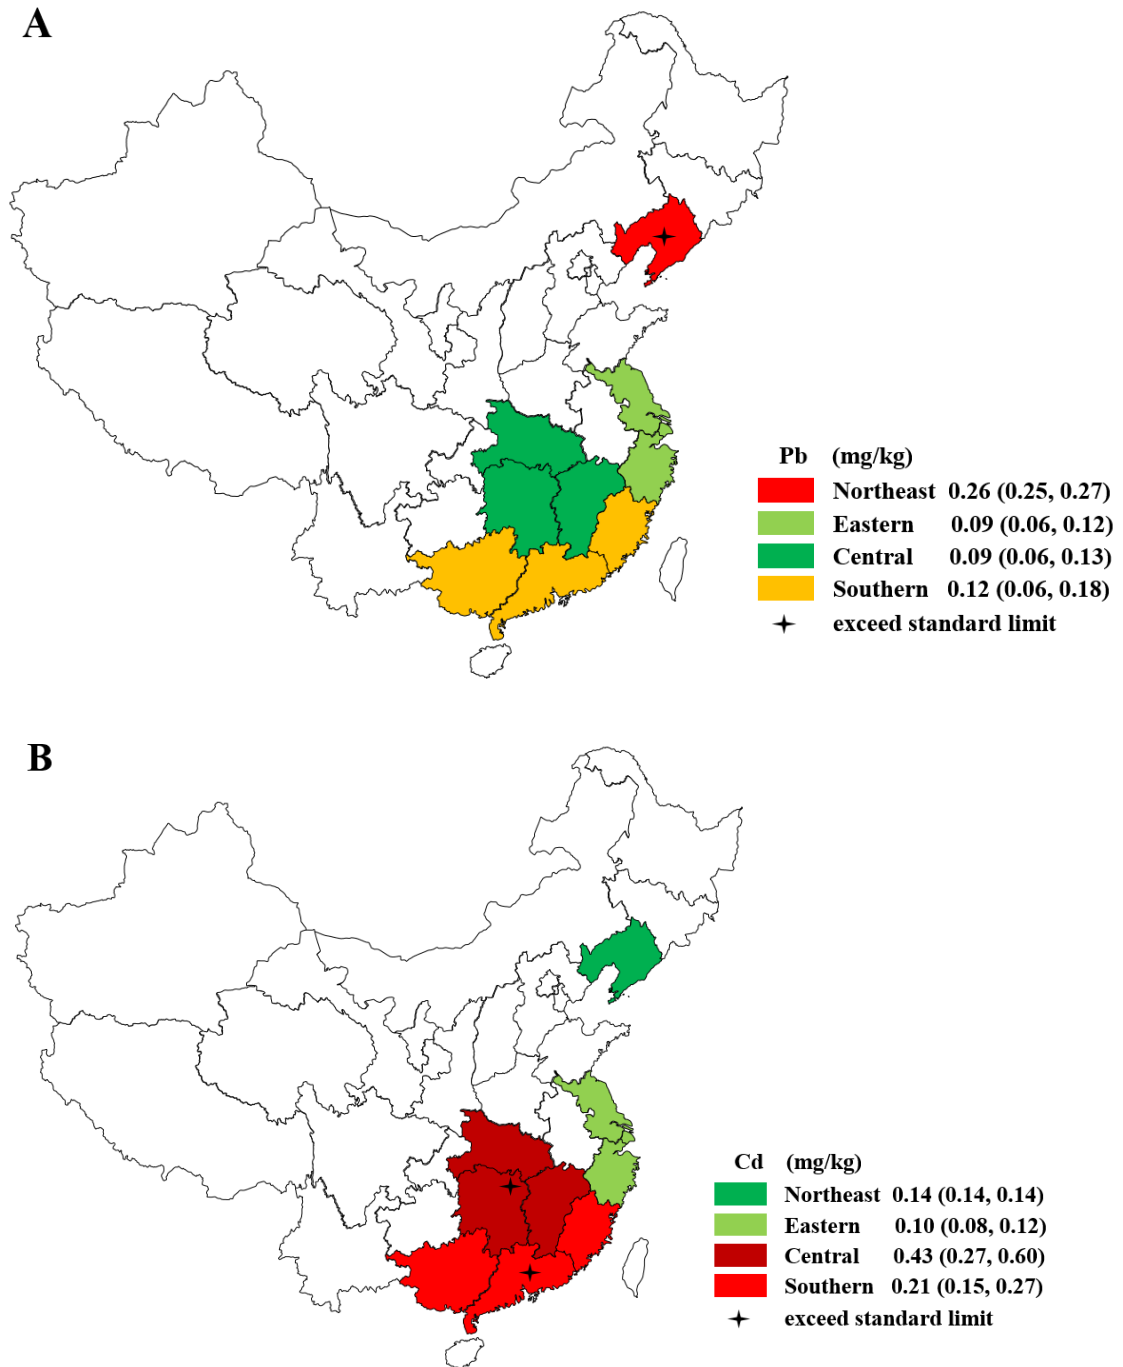

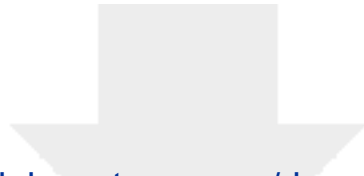

[Click here to access/download](#)

**Supporting Information**

Supplementary material for Publication.docx

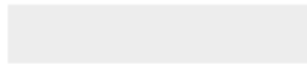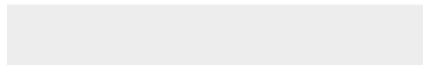



[Click here to access/download](#)

**Supporting Information**

**PRISMA\_2020\_checklist.docx**

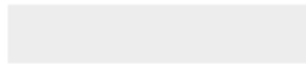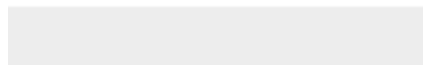

Supplement: pone.0278686.s002.pdf [file pone.0278686.s002.pdf]
